# Supplementary material
Source: MDPI journal article supplement (https://www.mdpi.com/2673-9976/6/1/106)
Supplement: s1 [file s1]

## 1. INTRODUCTION

In recent years, nutraceuticals prepared with cranberry (*Vaccinium macrocarpon*) have gained special attention because of their beneficial effects on human health (e.g., antioxidant activity and antimicrobial activity against bacteria involved in a wide range of diseases), which are mainly attributed to the high content of specific polyphenols in cranberry. However, these products present a risk of fraud consisting of the total or partial substitution of cranberry extracts with cheaper or more abundant fruit extracts.

In this study, flow injection analysis coupled to high-resolution mass spectrometry (FIA-HRMS) fingerprinting was proposed as a rapid high-throughput analytical approach to address the classification of berry-based products through chemometrics, focusing on cranberry-based products authentication. Thus, several berry-based natural products and cranberry-based nutraceuticals were analysed. After both negative and positive electrospray ionisation FIA-HRMS sample analysis, four different data matrices—including negative, positive, low-level data fusion (LLDF), and mid-level data fusion (MLDF) FIA-HRMS fingerprints—were then subjected to principal component analysis (PCA) and partial least squares regression-discriminant analysis (PLS-DA).

## 3. SAMPLES AND SAMPLE TREATMENT

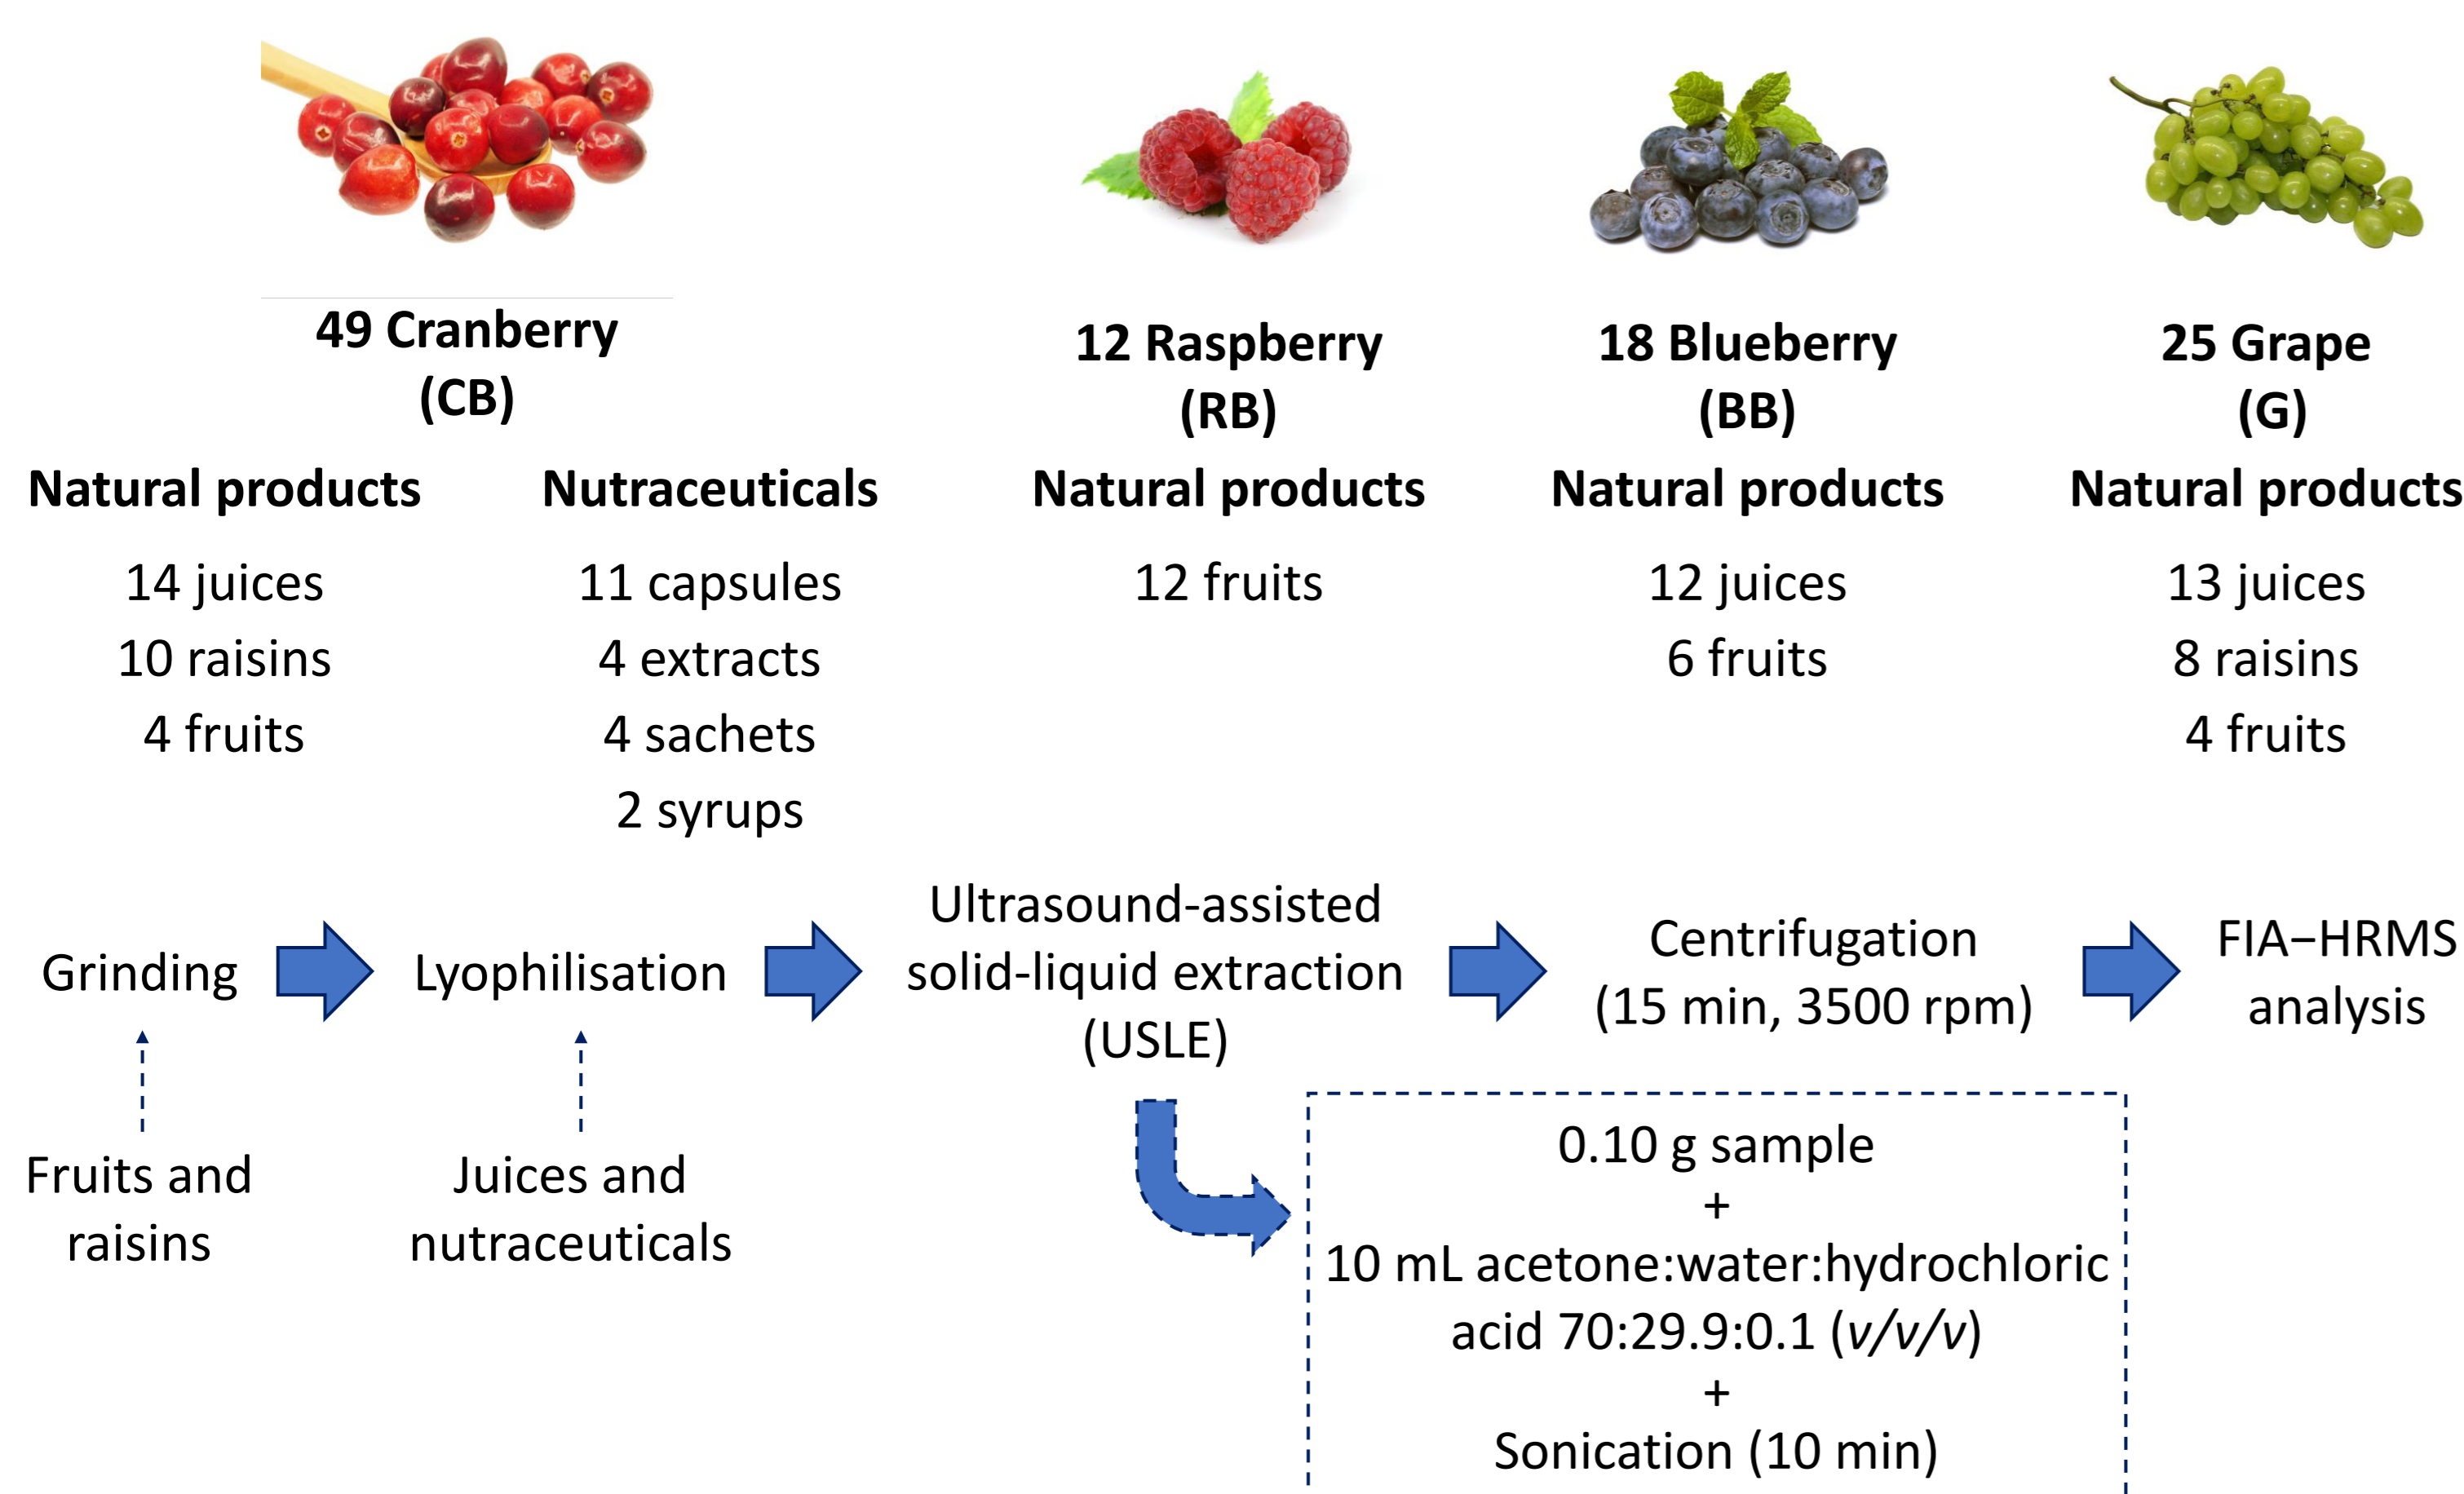

## 2. INSTRUMENTATION

### FIA SYSTEM

Accela autosampler and Accela 1250 Pump (Thermo Fisher Scientific)

Injection volume: 10  $\mu$ L

Carrier phase:

50% water 0.1% formic acid (v/v)  
50% acetonitrile

Flow rate: 150  $\mu$ L·min<sup>-1</sup>

### MASS SPECTROMETRY

Q-Exactive Orbitrap (Thermo Fisher Scientific)

Ionisation source: H-ESI ( $\pm$ )

Acquisition mode: Full Scan

m/z: 100 - 1500

S-Lens: 50 V

Vaporizer T: 250 °C

Sheath gas: 40 a.u.

Spray voltage:  $\pm$ 3.0 kV

Capillary T: 350 °C

Auxiliary gas: 12 a.u.

### DATA ANALYSIS

- mzMine 2.53 software [1]

- Solo 8.6 chemometrics software (Eigenvector Research)

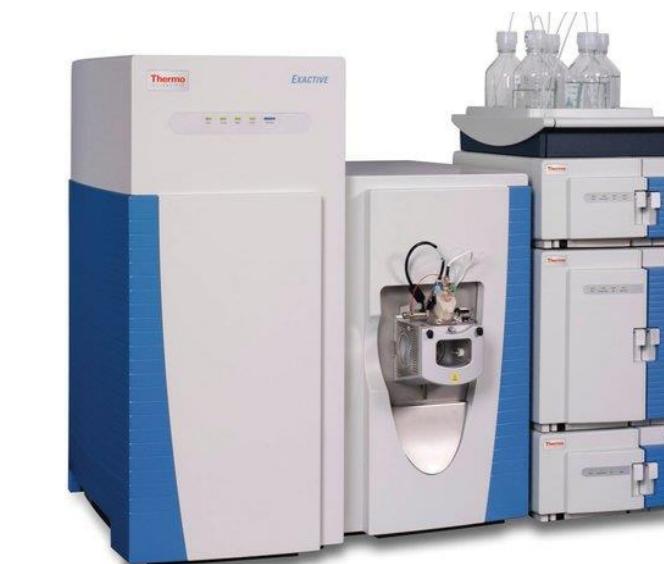

## 4. FIA-HRMS BERRY FINGERPRINTS

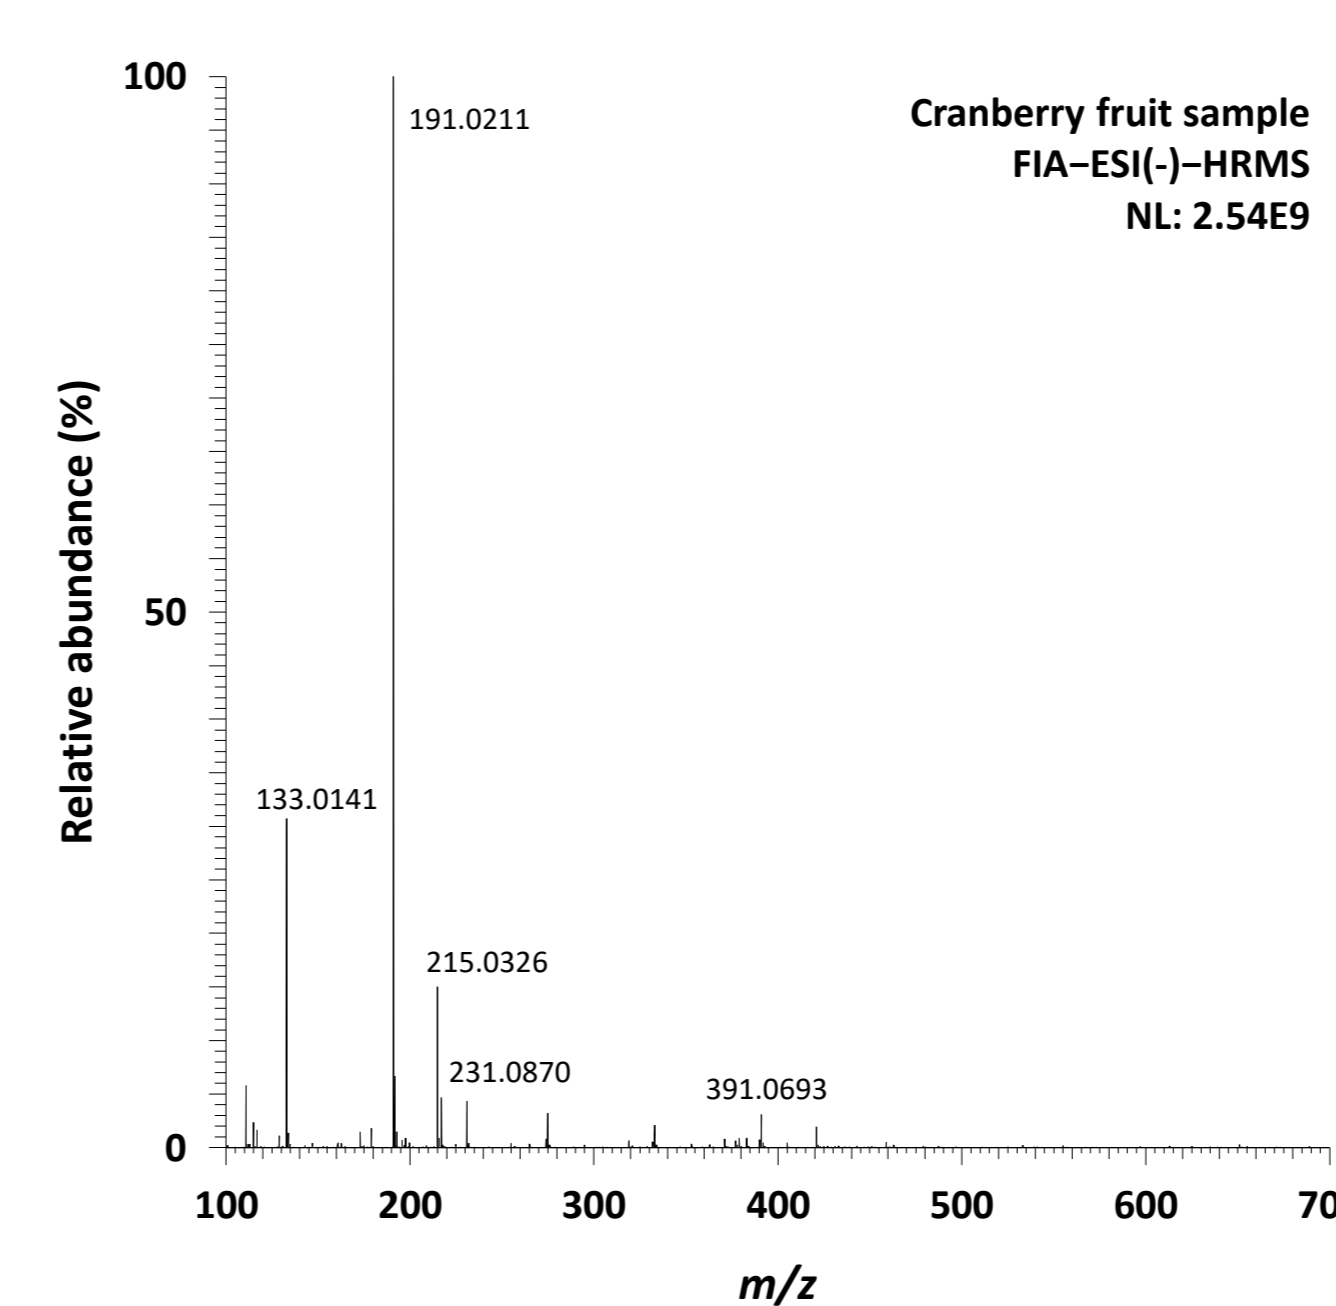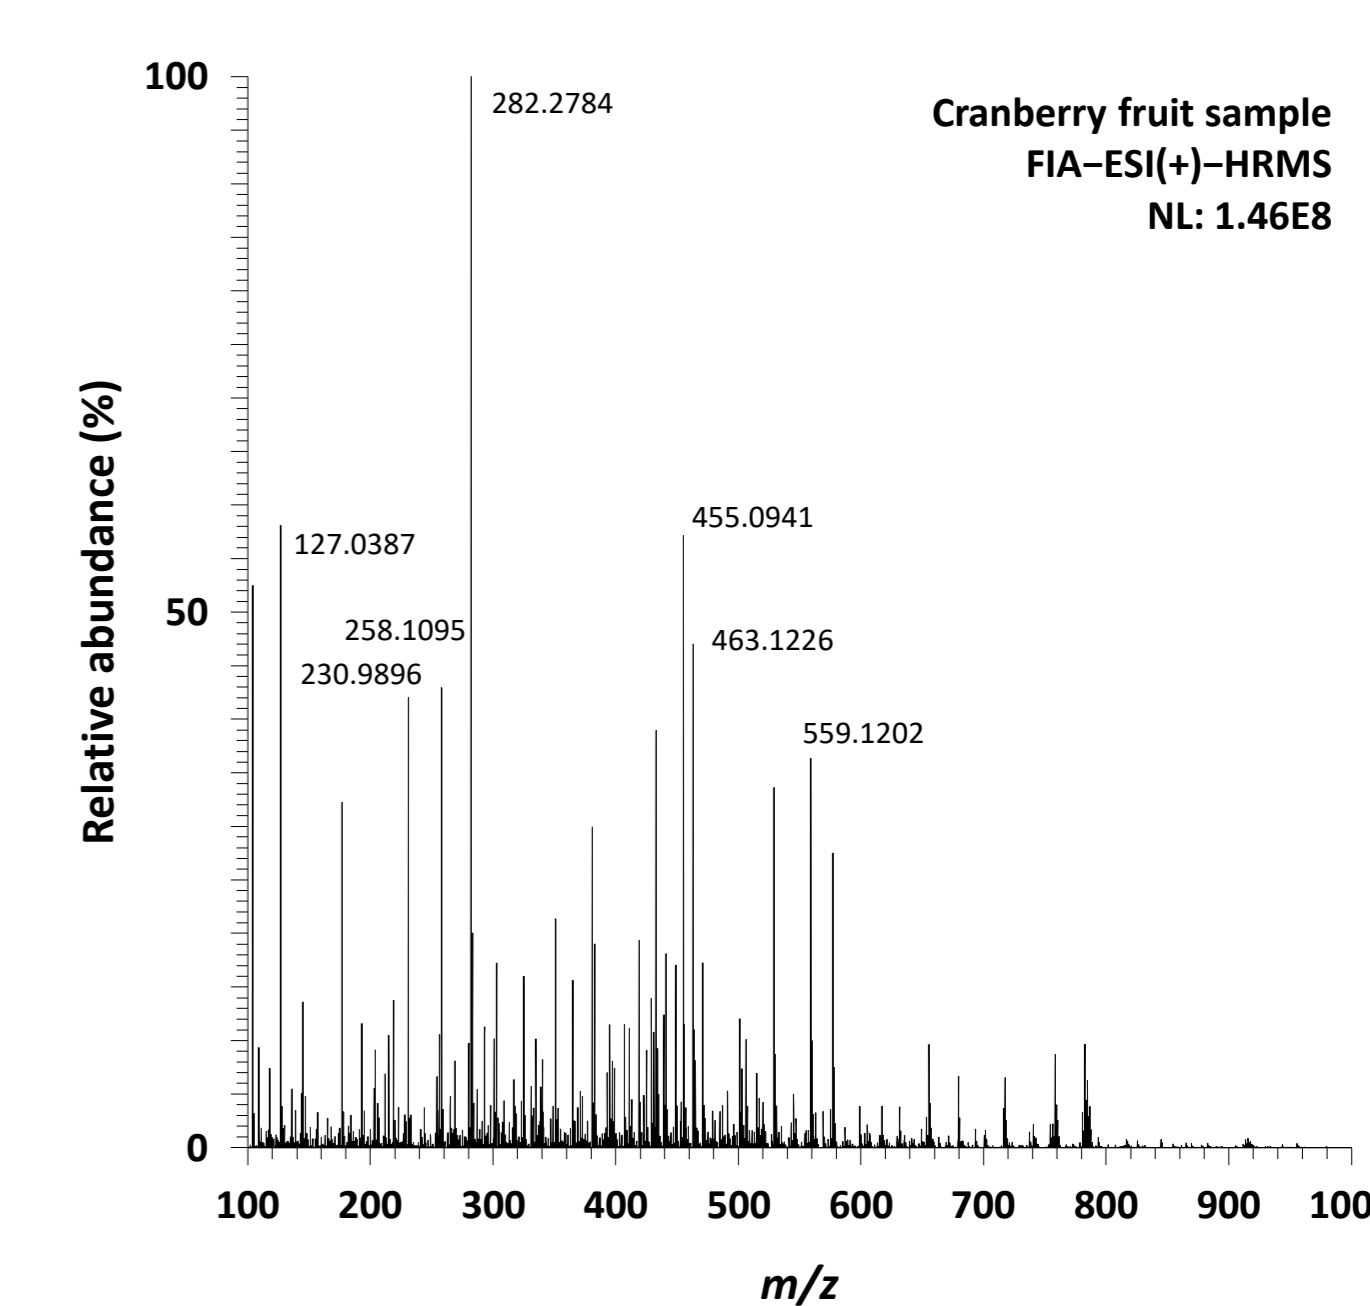

Negative (on the left) and positive (on the right) ionisation mode FIA-HRMS fingerprints for a cranberry fruit sample. MS spectrum are displayed in the m/z range from 100 to 700 and from 100 to 1000, respectively.

Remarkable differences in the FIA-HRMS fingerprints depending on the berry sample matrix were obtained.

## 5. CHEMOMETRIC ANALYSIS

### DATA MATRICES (samples $\times$ variables)

- Negative ionisation mode FIA-HRMS fingerprints: 104  $\times$  253
- Positive ionisation mode FIA-HRMS fingerprints: 104  $\times$  1012
- LLDF FIA-HRMS fingerprints: 104  $\times$  1265  
Concatenation of negative and positive ionisation mode FIA-HRMS fingerprints
- MLDF FIA-HRMS fingerprints: 104  $\times$  40  
Selection of the 10 most discriminant variables—those presenting the highest selectivity ratio and VIP values—in the individual PLS-DA models of each berry matrix against the others (e.g., cranberry vs. others)

### PCA AND PLS-DA

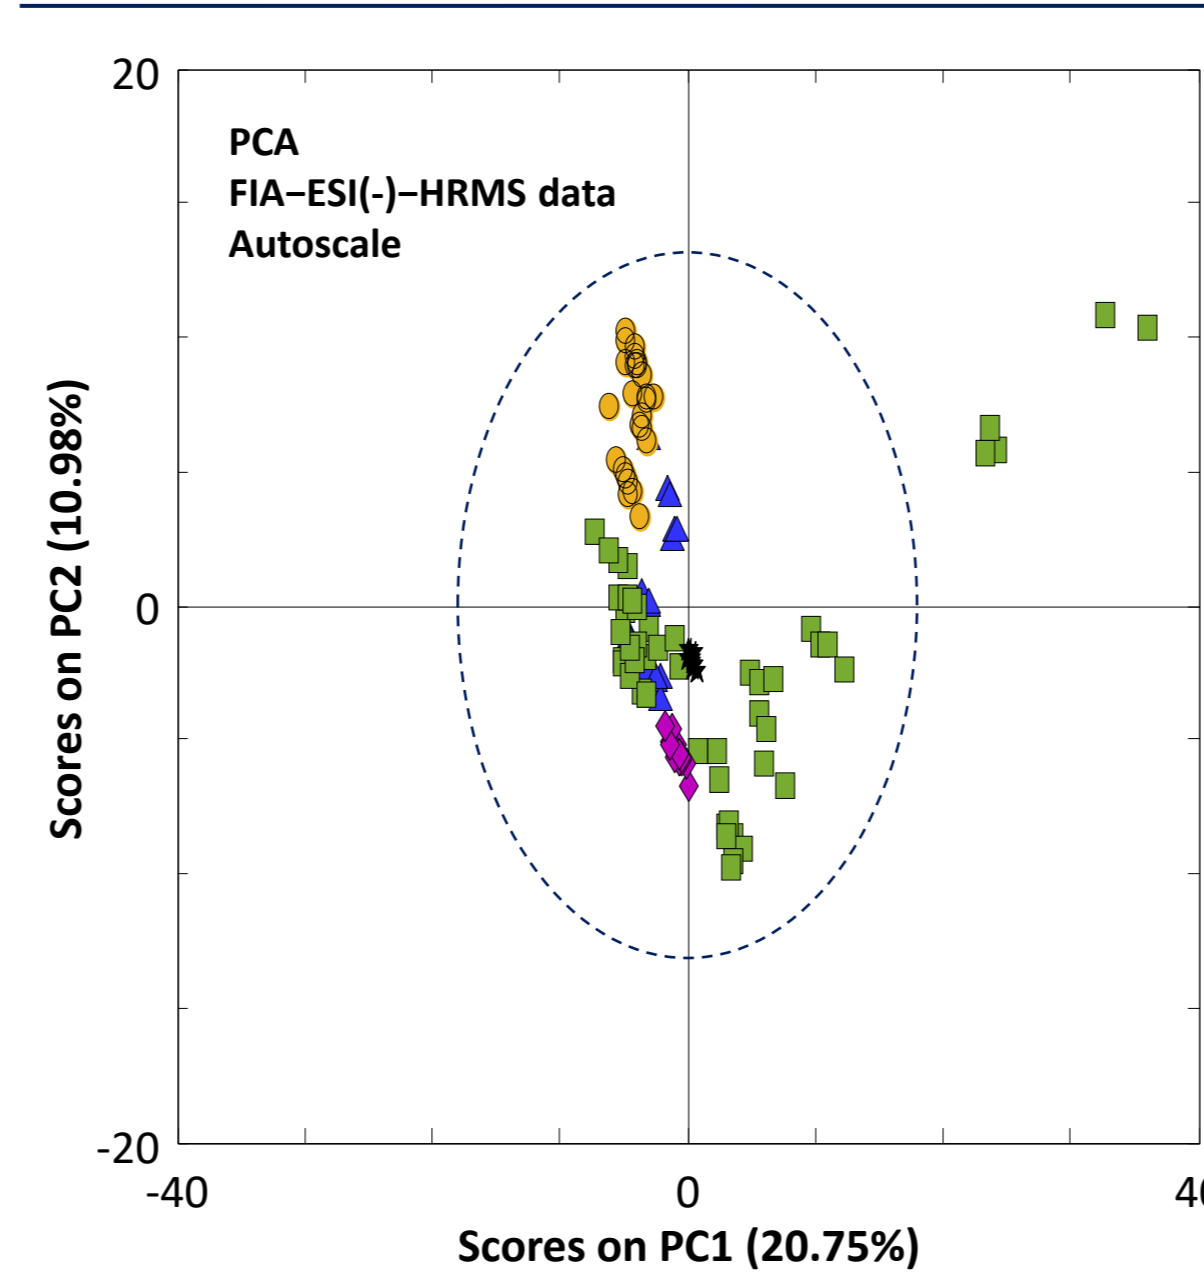

PCA allowed the identification of sample groups and trends as well as checking the correct behaviour of QC samples.

An excellent sample classification according to berry matrices was observed in the PLS-DA scores plots.

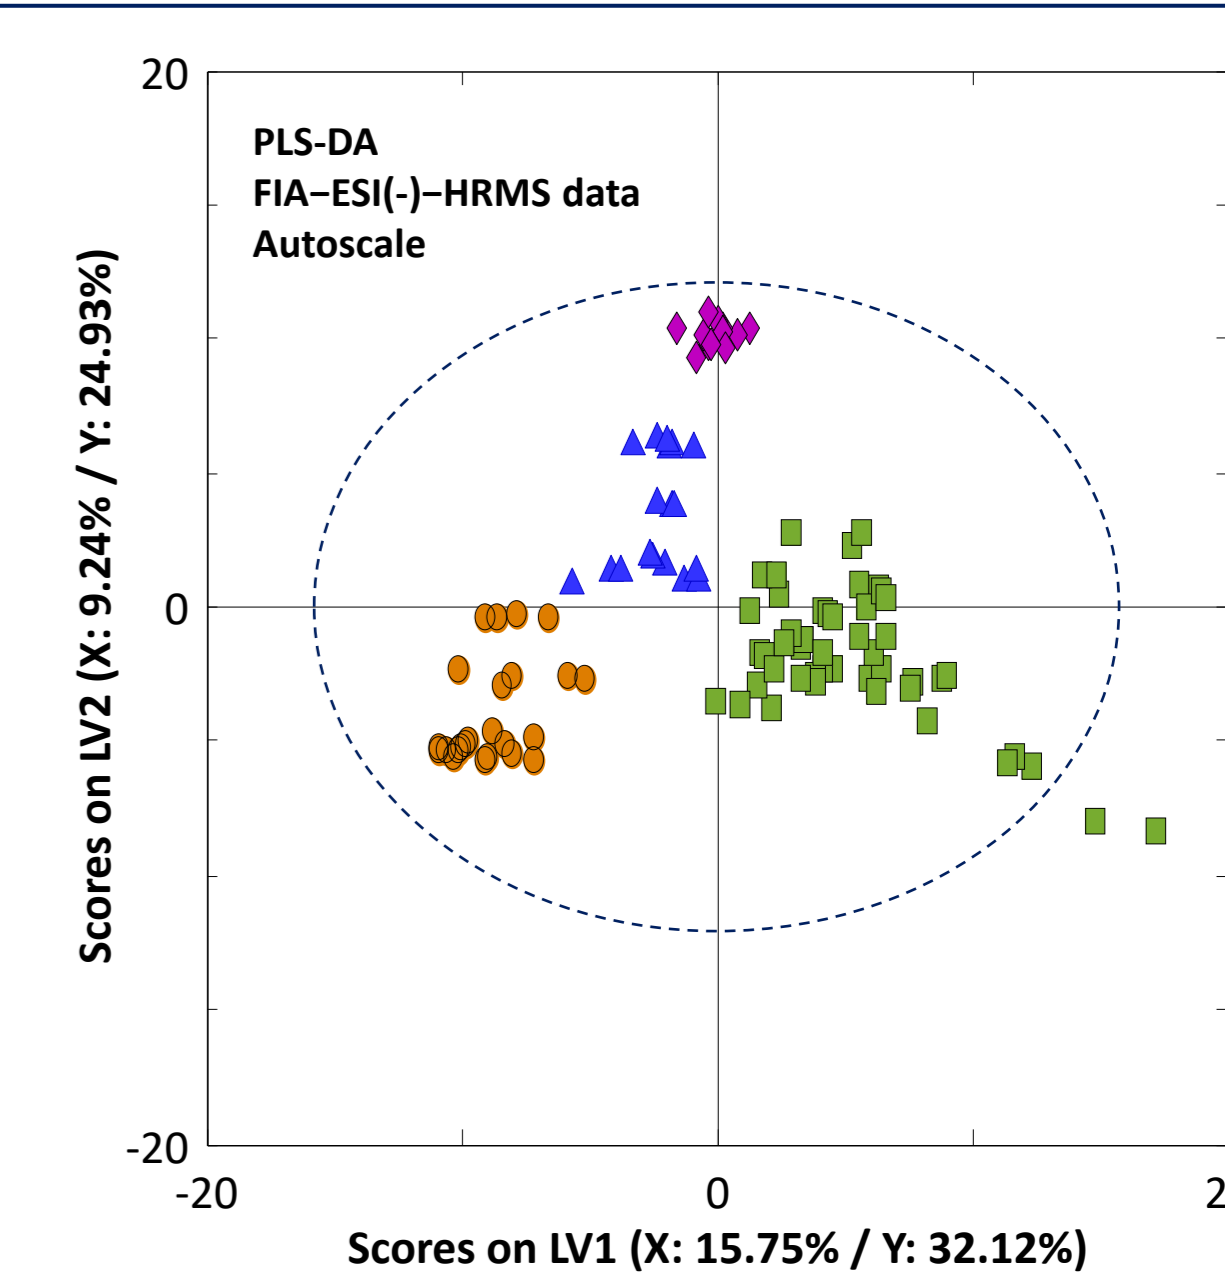

### CLASSIFICATION DECISION TREE AND EXTERNAL VALIDATION

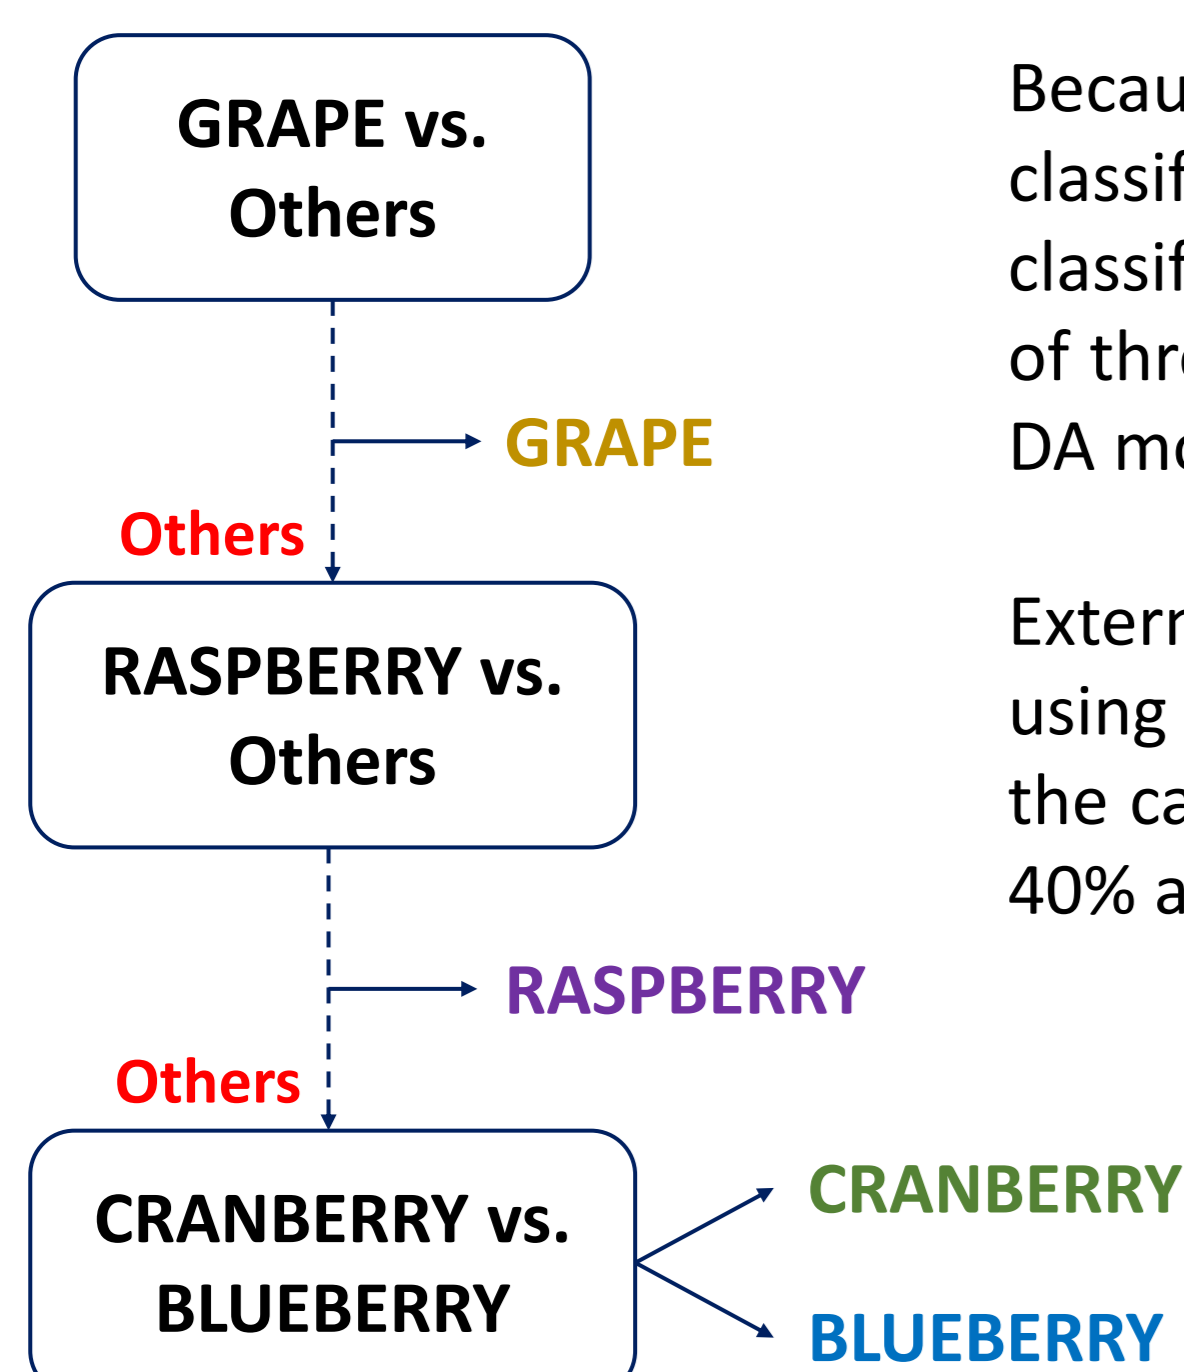

Because of the complexity of the classification under study, a classification decision tree consisting of three consecutive rule nodes (PLS-DA models) was proposed.

External validation was carried out, using 60% of the analysed samples as the calibration set and the remaining 40% as the validation set.

External validation parameters—class sensitivity (%), class specificity (%), and global accuracy (%)—obtained by the proposed classificatory strategy for all the used data matrices.

|               | CRANBERRY |       | RASPBERRY |       | BLUEBERRY |       | GRAPE |       |          |
|---------------|-----------|-------|-----------|-------|-----------|-------|-------|-------|----------|
|               | SENS.     | SPEC. | SENS.     | SPEC. | SENS.     | SPEC. | SENS. | SPEC. | ACCURACY |
| FIA-HRMS (-)  | 85.0      | 100.0 | 100.0     | 100.0 | 57.1      | 100.0 | 100.0 | 100.0 | 85.7     |
| FIA-HRMS (+)  | 75.0      | 95.5  | 100.0     | 100.0 | 85.7      | 100.0 | 100.0 | 100.0 | 85.7     |
| LLDF FIA-HRMS | 80.0      | 90.9  | 100.0     | 100.0 | 71.4      | 100.0 | 100.0 | 100.0 | 85.7     |
| MLDF FIA-HRMS | 95.0      | 100.0 | 100.0     | 100.0 | 85.7      | 100.0 | 100.0 | 100.0 | 95.2     |

## 6. CONCLUSIONS

- FIA-HRMS fingerprinting, combined with chemometrics, proved to be a suitable analytical approach to address berry-based products classification, independently of their type.
- The classification decision tree strategy provided excellent class sensitivity, class specificity, and global accuracy values in the external validation, especially when applying the MLDF approach.
- Further investigation through liquid chromatography coupled to high-resolution mass spectrometry (LC-HRMS) of the found discriminant ions could lead to their identification.

## 7. REFERENCES

[1] Pluskal, T.; Castillo, S.; Villar-Briones, A.; Orešič, M. (2010). Mzmine 2: Modular framework for processing, visualizing, and analyzing mass spectrometry-based molecular profile data. *BMC Bioinformatics*, 11, 395. <https://doi.org/10.1186/1471-2105-11-395>

## 8. ACKNOWLEDGEMENTS

The authors are grateful for the financial support received from the Spanish Ministry of Science, Innovation and Universities, through the grant PGC2018-095013-B-I00, from the *Agencia Estatal de Investigación* through the grant PID2020-114401RB-C22, and from the Agency for Administration of University and Research Grants (Generalitat de Catalunya), through the grants 2017SGR-171 and 2017SGR-310. G. Campmajó thanks the University of Barcelona for the PhD APIF fellowship.
